# Supplementary material for: A study on the holistic efficacy of different Radix Aconiti Preparata for treating rheumatic arthritis in rats based on the urinary metabonomic method using UPLC-Q-TOF-HDMS
Source: Royal Society of Chemistry journal article supplement (doi:10.1039/c6ay00260a), 2016-01-01
Supplement: c6ay00260a1.pdf [file c6ay00260a1.pdf]

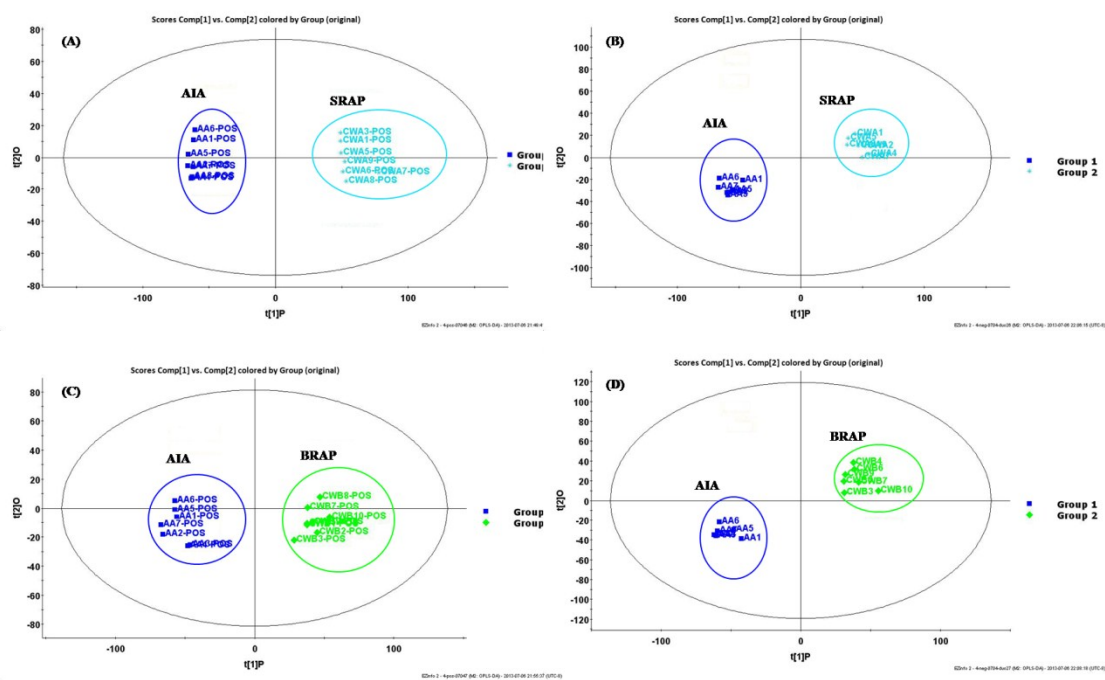

**Fig. S1** OPLS-DA score plots of urine metabolic profiling of AIA and SRAP in positive mode (A) and negative mode (B); OPLS-DA score plots of urine metabolic profiling of AIA and BRAP in positive mode (C) and negative mode (D).

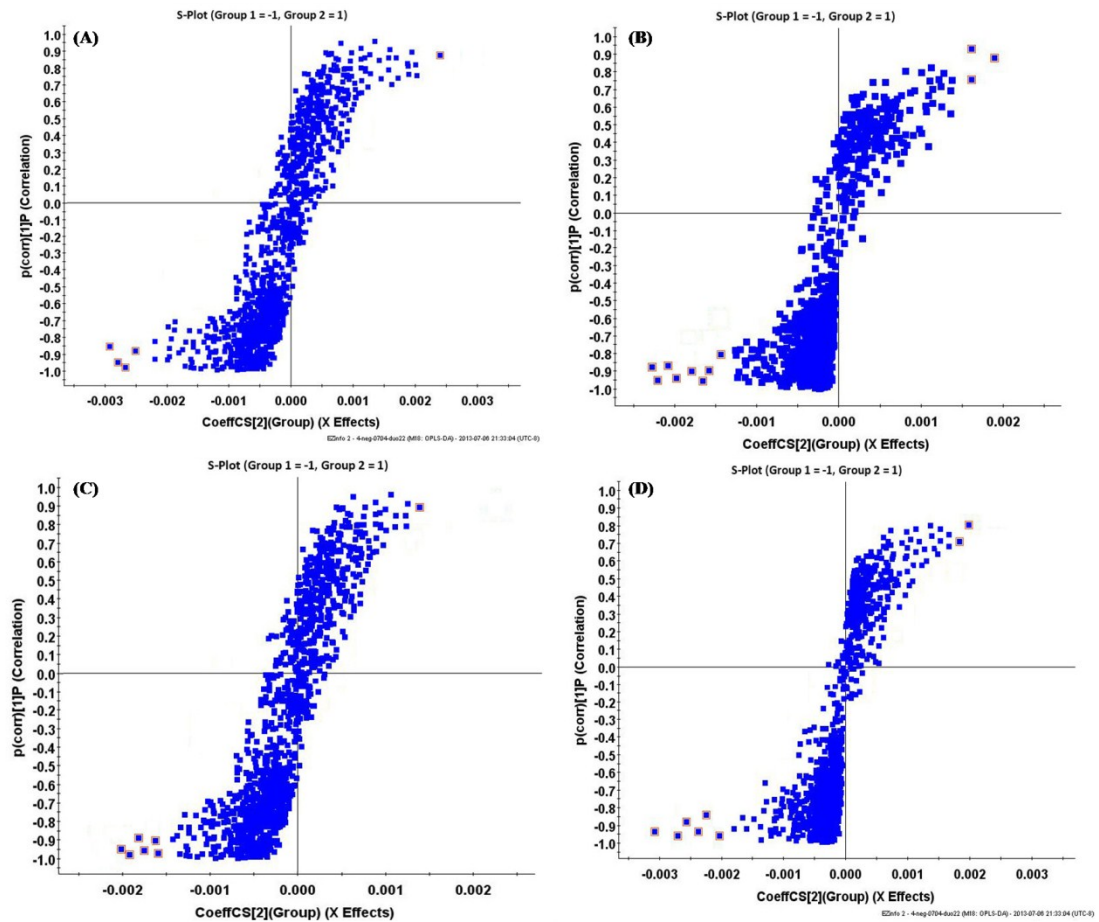

**Fig. S2** S-plots of OPLS-DA for AIA and SRAP in positive mode (A) and negative mode (B); S-plots of OPLS-DA for AIA and BRAP in positive mode (C) and negative mode (D);
